# Supplementary material
Source: publisher site journal article supplement (https://www.dovepress.com/article/452665)
Supplement: Supplementary file 1 [file get_supplementary_file.php]

**Supplementary Information**

**Supplementary Table 1** Correlation between PSG parameters, ESS, GAD-7, PHQ-9, and FSS scores, MSLT, and brain function state monitoring indices in patients with NT1

| *ρ* | anxiety propensity | brain fatigue |
| --- | --- | --- |
| TST | -0.191 | 0.152 |
| SE | -0.207 | -0.297 |
| SOL | -0.039 | -0.390 |
| WASO | 0.258 | 0.441 |
| ESS | -0.130 | -0.219 |
| GAD-7 | 0.456 | -0.093 |
| PHQ-9 | 0.000 | -0.224 |
| FSS | 0.042 | 0.866** |
| mean sleep latency | 0.235 | -0.513* |
| SOREMP | -0.234 | 0.169 |

**Notes:** * Represents for statistically different (*P*adj<0.05). ** Statistically significant difference (*P*adj<0.001).

**Abbreviations:** PSG, polysomnography; ESS, Epworth sleepiness scale; GAD-7, Generalized Anxiety Disorder-7; PHQ-9, Patient Health Questionnaire-9; FSS, Fatigue Severity Scale; MSLT, multiple sleep latency test; NT1, Narcolepsy type 1; TST, total sleep time; SE, sleep efficiency; SOL, sleep onset latency; WASO, wake after sleep onset; SOREMP, sleep-onset REM period.
